# Supplementary material for: Population-Matched Transcriptome Prediction Increases TWAS Discovery and Replication Rate
Source: PubMed Central journal article supplement (PMC7721644; doi:10.1016/j.isci.2020.101850), 2020-11-23
Supplement: mmc1.pdf [file mmc1.pdf]

Article

# Population-Matched Transcriptome Prediction Increases TWAS Discovery and Replication Rate

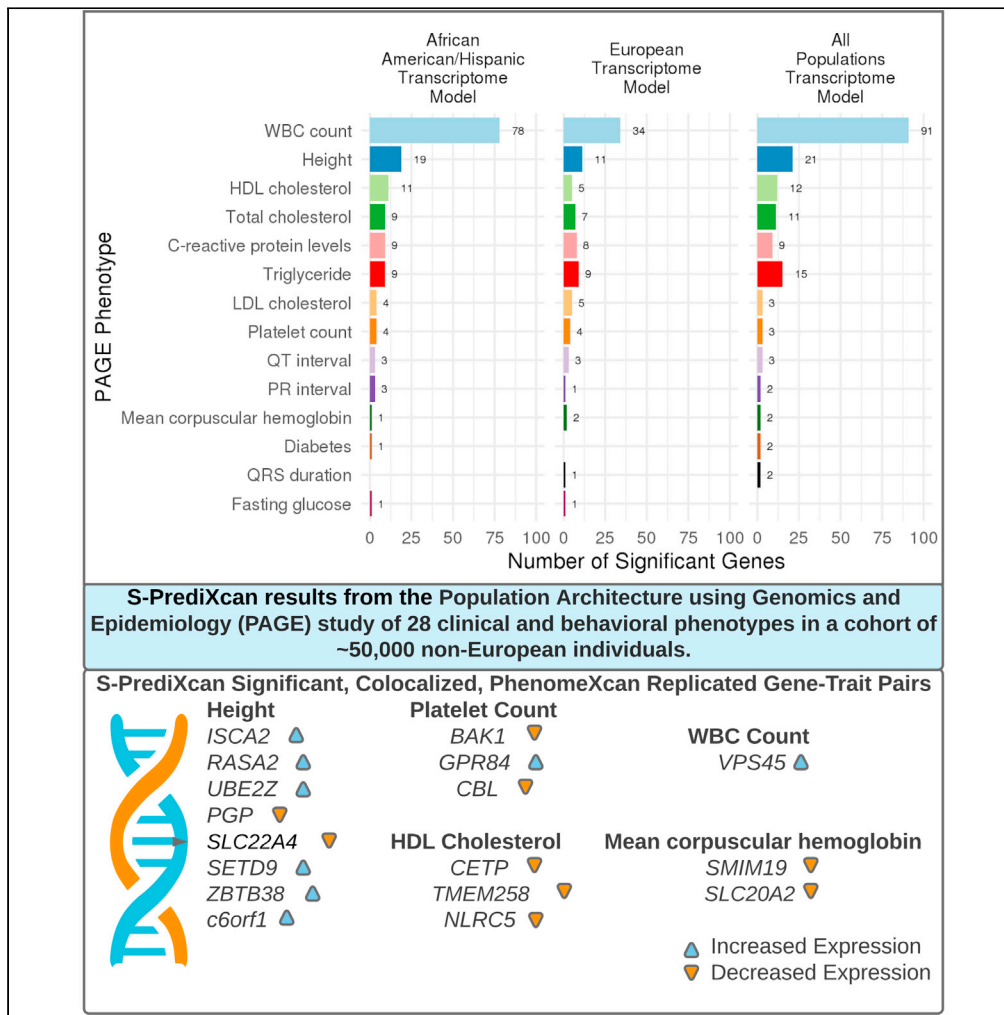

Elyse Geoffroy,  
Isabelle Gregga,  
Heather E.  
Wheeler

hwheeler1@luc.edu

**HIGHLIGHTS**

TWAS mechanistically extends GWAS findings in diverse populations

Population-matched transcriptome models detect more replicable associations

Colocalization shows GWAS variants likely act through gene expression regulation

More GWAS and transcriptome modeling in diverse populations are needed

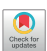

## Article

## Population-Matched Transcriptome Prediction Increases TWAS Discovery and Replication Rate

Elyse Geoffroy,<sup>1</sup> Isabelle Gregga,<sup>2</sup> and Heather E. Wheeler<sup>1,2,3,\*</sup>

## SUMMARY

**Most genome-wide association studies (GWAS) and transcriptome-wide association studies (TWAS) focus on European populations; however, these results cannot always be accurately applied to non-European populations due to genetic architecture differences. Using GWAS summary statistics in the Population Architecture using Genomics and Epidemiology study, which comprises ~50,000 Hispanic/Latinos, African Americans, Asians, Native Hawaiians, and Native Americans, we perform TWAS to determine gene-trait associations. We compared results using three transcriptome prediction models derived from Multi-Ethnic Study of Atherosclerosis populations: the African American and Hispanic/Latino (AFHI) model, the European (EUR) model, and the African American, Hispanic/Latino, and European (ALL) model. We identified 240 unique significant trait-associated genes. We found more significant, colocalized genes that replicate in larger cohorts when applying the AFHI model than the EUR or ALL model. Thus, TWAS with population-matched transcriptome models have more power for discovery and replication, demonstrating the need for more transcriptome studies in diverse populations.**

## INTRODUCTION

Genome-wide association studies (GWAS) test single-nucleotide polymorphisms (SNPs) across the genome for association with diseases and other complex traits. GWAS have identified thousands of SNP-trait associations with complex traits; however, the majority of the studies exclusively include individuals of European ancestries (Buniello *et al.*, 2019). As of 2017, within 4655 GWAS, 78% of individuals come from European ancestries (Morales *et al.*, 2018), creating a significant gap of knowledge for those of non-European descent. Even when present in large scale biobanks, non-European populations are often excluded from genetic analyses (Peterson *et al.*, 2019; Ben-Eghan *et al.*, 2020), which further worsens under-representation of diverse populations in research. As those of European ancestries only make up a small fraction of the human population, expanding the number of non-European individuals in genomic research benefits all populations by more fully incorporating global genetic diversity in association studies. Since populations were isolated from each other by geography throughout large spans of human history, allele frequencies and effect sizes differ across populations, making current GWAS results poor genetic predictors for non-European populations (Mogil *et al.*, 2018; Martin *et al.*, 2019; Keys *et al.*, 2020). To start to address this problem, the Population Architecture using Genomics and Epidemiology (PAGE) study performed 28 GWAS on clinical and behavioral phenotypes in a multi-ancestries cohort that included Hispanic/Latinos, African Americans, Asians, Native Hawaiians, and Native Americans (Wojcik *et al.*, 2019). The PAGE study is the largest collection of GWAS conducted in non-Europeans.

Meanwhile, transcriptome-wide association studies (TWAS) incorporate transcriptome data along with genotype and phenotype data to make gene-trait associations (Gamazon *et al.*, 2015; Gusev *et al.*, 2016). In TWAS, expression quantitative trait loci (eQTL) data are used to build models that predict gene expression levels from genotypes. The models are integrated with GWAS data to test genes, rather than SNPs, for association with complex traits. Gene-trait associations identified through TWAS provide evidence that gene regulatory mechanisms underlie the trait's biology. TWAS have not yet been applied to the PAGE GWAS results.

<sup>1</sup>Program in Bioinformatics, Loyola University Chicago, Chicago, IL 60660, USA

<sup>2</sup>Department of Biology, Loyola University Chicago, Chicago, IL 60660, USA

<sup>3</sup>Lead Contact

\*Correspondence: hwheeler1@luc.edu

<https://doi.org/10.1016/j.isci.2020.101850>

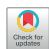

Here, we perform TWAS with S-PrediXcan (Barbeira *et al.*, 2018) in PAGE using GWAS summary statistics and three transcriptome prediction models built in the Multi-Ethnic Study of Atherosclerosis (MESA) (Bild *et al.*, 2002; Liu *et al.*, 2013; Mogil *et al.*, 2018). We compared performance and replication of each transcriptome prediction model to determine whether population ancestry matching or sample size is more important in TWAS. We use one transcriptome model built in the MESA African American and Hispanic/Latino (AFHI) populations, one built in the MESA European population (EUR), and another built in the MESA African American, Hispanic/Latino, and European (ALL) populations combined. From there, we colocalize our S-PrediXcan results using COLOC software (Giambartolomei *et al.*, 2014; Hormozdiari *et al.*, 2016; Barbeira *et al.*, 2018; Pividori *et al.*, 2020; Barbeira *et al.*, 2019) to provide more evidence the SNPs in discovered genes are acting through gene expression regulation to affect the associated phenotypes. We then tested discovered associations for replication using the PhenomeXcan database, which includes S-PrediXcan results from large, predominantly European GWAS (Pividori *et al.*, 2020). We find a higher proportion of gene-trait pairs identified in PAGE replicate when we use the population-matched AFHI transcriptome prediction model than either the EUR or ALL transcriptome prediction models. All scripts used for analyses are available at [https://github.com/WheelerLab/MESA\\_expression\\_prediction](https://github.com/WheelerLab/MESA_expression_prediction).

## RESULTS

We sought to perform TWAS in the PAGE study (Wojcik *et al.*, 2019) to reveal new associations or show that previously discovered GWAS loci likely act through transcription regulation to affect the trait. We also sought to compare TWAS results in the diverse PAGE cohort using two different transcriptome prediction models, one built in populations that more closely match the genetic ancestries of PAGE and one that is composed of individuals of European genetic ancestries. In addition, we compared these results to a third transcriptome model that included all available populations. In the PAGE study, 28 GWAS on clinical and behavioral phenotypes (Table 1) were performed (Wojcik *et al.*, 2019). Individuals in PAGE self-identified as Hispanic/Latino ( $n = 22,216$ ), African American ( $n = 17,299$ ), Asian ( $n = 4,680$ ), Native Hawaiian ( $n = 3,940$ ), Native American ( $n = 652$ ), or Other ( $n = 1,052$ ) (Wojcik *et al.*, 2019). In comparison to any other GWAS, this study includes the most phenotypes tested in a single study, the most trait associations, and the highest number of non-European individuals (Wojcik *et al.*, 2019). TWAS integrate genetically regulated gene expression into complex trait mapping studies, but like GWAS, most are performed in European populations (Gamazon *et al.*, 2015; Gusev *et al.*, 2016). We compared S-PrediXcan results using transcriptome prediction models trained with genotype and monocyte gene expression data from three populations in MESA to find genes associated with traits in PAGE. Two MESA models (Mogil *et al.*, 2018) were built in populations of similar size: EUR ( $n = 578$ ), which comprises individuals of European ancestries and reflects transcriptome data more readily available, and AFHI ( $n = 585$ ), which comprises individuals of African American and Hispanic/Latino ancestries and more closely resembles the ancestries of individuals in PAGE. However, we also use ALL ( $n = 1,163$ ), which includes both EUR and AFHI individuals, to see if increased sample size with increased population diversity improves our ability to discover and replicate TWAS associations.

### TWAS Identifies More Significant Genes when Using Larger and Population-Matched Gene Expression Prediction Models

We used S-PrediXcan with the summary statistics from the 28 PAGE GWAS and either the AFHI, EUR, or ALL MESA transcriptome prediction models to perform TWAS. We found 14 of the 28 different PAGE phenotypes returned significant gene-trait associations (Table 1). We identified 152 significant gene-trait pairs with the AFHI transcriptome prediction model, 91 significant gene-trait pairs with the EUR transcriptome prediction model, and 176 significant gene-trait pairs with the ALL transcriptome prediction model (Table S1,  $P < 0.05/n$ , where  $n$  is the number of genes tested for association with each trait). In total, we identified 206 unique genes and 240 unique gene-trait pairs. Of the 240 unique gene-trait pairs, we found 50 using all three MESA models, 53 using both AFHI and EUR MESA models, 63 using AFHI and ALL MESA models, 13 using EUR and ALL MESA models, and 57 overlapped with gene-trait pairs previously mapped as a nearby gene to SNPs discovered in the original PAGE GWAS (Table S1) (Wojcik *et al.*, 2019). The Z-scores of the AFHI and EUR identified genes are highly correlated ( $R = 0.63$ ), indicating that most genes have similar effects across population models and just miss reaching the significance threshold in one population or the other (Figure 1). This Z score correlation remains when all tested genes, not just those that reached significance with one population model, are compared ( $R = 0.69$ , Figure S1). If we are more conservative in our TWAS multiple testing adjustment and correct for all tests performed, not just tests within a trait, 95 gene-trait pairs remain significant with AFHI, 46 gene-trait pairs with EUR, and 121 gene-trait pairs with ALL ( $P < 1.1 \times 10^{-7}$ , Figure 2, Table S1).

| Trait                                                   | Total N or N Cases/N Controls | Mean or % Cases | SD of Mean | TWAS with AFHI Count | TWAS with EUR Count | TWAS with all Count |
|---------------------------------------------------------|-------------------------------|-----------------|------------|----------------------|---------------------|---------------------|
| Inflammatory traits                                     |                               |                 |            |                      |                     |                     |
| C-reactive protein (CRP) (mg/L)                         | 28,520                        | 4.114           | 4.836      | 9                    | 8                   | 9                   |
| White blood cell (WBC) count (10 <sup>9</sup> cells/L)  | 28,608                        | 6.253           | 1.943      | 78                   | 34                  | 91                  |
| Mean corpuscular hemoglobin concentration (MCHC) (g/dL) | 19,803                        | 32.909          | 1.249      | 1                    | 2                   | 2                   |
| Platelets (per mL)                                      | 29,328                        | 246.783         | 64.273     | 4                    | 4                   | 3                   |
| Lipid traits                                            |                               |                 |            |                      |                     |                     |
| HDL cholesterol (mg/dL) <sup>a</sup>                    | 33,063                        | 50.738          | 15.372     | 11                   | 5                   | 12                  |
| LDL cholesterol (mg/dL) <sup>a</sup>                    | 32,221                        | 137.777         | 40.945     | 4                    | 5                   | 3                   |
| Triglycerides (mg/dL) <sup>a</sup>                      | 33,096                        | 137.830         | 92.125     | 9                    | 9                   | 15                  |
| Total Cholesterol (mg/dL) <sup>a</sup>                  | 33,185                        | 214.864         | 46.452     | 9                    | 7                   | 11                  |
| Lifestyle traits                                        |                               |                 |            |                      |                     |                     |
| Cigarettes/day exclude nonsmokers                       | 15,862                        | 12.507          | 9.088      | 0                    | 0                   | 0                   |
| Coffee (cups/day)                                       | 35,902                        | 0.893           | 1.130      | 0                    | 0                   | 0                   |
| Glycemic traits                                         |                               |                 |            |                      |                     |                     |
| HbA1c (mmol/mol) <sup>b</sup>                           | 11,178                        | 36.823          | 4.520      | 0                    | 0                   | 0                   |
| Fasting insulin (pmol/L) <sup>b</sup>                   | 21,551                        | 10.233          | 7.979      | 0                    | 0                   | 0                   |
| Fasting glucose (mmol/L) <sup>b</sup>                   | 23,911                        | 5.050           | 0.633      | 1                    | 1                   | 0                   |
| Type 2 diabetes (cases/controls)                        | 14,042/31,683                 | 30.7%           |            | 1                    | 0                   | 2                   |
| Electrocardiogram traits                                |                               |                 |            |                      |                     |                     |
| QT interval (ms)                                        | 17,348                        | 410.678         | 30.580     | 3                    | 3                   | 3                   |
| QRS interval (ms)                                       | 17,046                        | 89.023          | 9.596      | 0                    | 1                   | 2                   |
| PR interval (ms)                                        | 17,422                        | 158.909         | 22.364     | 3                    | 1                   | 2                   |
| Blood Pressure traits                                   |                               |                 |            |                      |                     |                     |
| Systolic blood pressure (mm Hg) <sup>a</sup>            | 35,433                        | 132.150         | 22.243     | 0                    | 0                   | 0                   |
| Diastolic blood pressure (mm Hg) <sup>a</sup>           | 35,433                        | 80.681          | 13.827     | 0                    | 0                   | 0                   |
| Hypertension (cases/controls)                           | 27,123/22,018                 | 55.2%           |            | 0                    | 0                   | 0                   |
| Anthropometric traits                                   |                               |                 |            |                      |                     |                     |
| WHR-females <sup>b</sup>                                | 24,838                        | 0.855           | 0.082      | 0                    | 0                   | 0                   |
| WHR-males <sup>b</sup>                                  | 9,066                         | 0.952           | 0.066      | 0                    | 0                   | 0                   |
| WHR                                                     | 33,904                        | NA              | NA         | 0                    | 0                   | 0                   |
| Height (cm)                                             | 49,796                        | 163.893         | 9.568      | 19                   | 11                  | 21                  |
| BMI (kg/m <sup>2</sup> )                                | 49,335                        | 29.333          | 6.285      | 0                    | 0                   | 0                   |

**Table 1. Population Architecture Using Genomics and Epidemiology (PAGE) Phenotypes Tested in TWAS and the Significant Gene Counts for Each Phenotype and Transcriptome Prediction Model**

(Continued on next page)

| Trait                                    | Total N or N Cases/N Controls | Mean or % Cases | SD of Mean | TWAS with AFHI Count | TWAS with EUR Count | TWAS with all Count |
|------------------------------------------|-------------------------------|-----------------|------------|----------------------|---------------------|---------------------|
| Kidney traits                            |                               |                 |            |                      |                     |                     |
| Chronic kidney disease (cases/controls)  | 4,154/41,573                  | 10.0%           |            | 0                    | 0                   | 0                   |
| End-stage renal disease (cases/controls) | 602/32,459                    | 1.9%            |            | 0                    | 0                   | 0                   |
| eGFR (mL/min) <sup>c</sup>               | 27,900                        | 90.548          | 21.880     | 0                    | 0                   | 0                   |

**Table 1. Continued**

Phenotype information and GWAS sample sizes were taken from [Table S1 in Wojcik et al., 2019](#). [Wojcik et al., 2019](#) had a combined Nmax = 49,839.

<sup>a</sup>Traits have been adjusted for medications by adding a constant.

<sup>b</sup>Traits have been adjusted for BMI.

<sup>c</sup>Estimated glomerular filtration rate (eGFR) was calculated using the CKD-EPI (Chronic Kidney Disease Epidemiology Collaboration) formula from [Levey et al., 2009](#). See [Wojcik et al., 2019](#) for details.

SD = standard deviation; WHR = waist-to-hip ratio; HbA1c = hemoglobin A1c; eGFR = estimated glomerular filtration rate; CRP = c-reactive protein; MCHC = mean corpuscular hemoglobin concentration; BMI = body mass index; AFHI = African American and Hispanic/Latino transcriptome prediction model; EUR = European transcriptome model; ALL = African American, Hispanic/Latino, and European transcriptome model; MESA = Multi-Ethnic Study of Atherosclerosis; PAGE = Population Architecture using Genomics and Epidemiology study.

### Colocalization of TWAS Results Identifies SNPs Most Likely to Act through Gene Expression Regulation

Across all TWAS phenotypes, white blood cell (WBC) count had the highest number of significant genes for each transcriptome model. We identified 34 genes (91% on chromosome 1) significantly associated with WBC count using EUR models, 78 genes (96% on chromosome 1) using AFHI models, and 91 genes (99% on chromosome 1) using ALL models. Because linkage disequilibrium and gene co-regulation are potential confounders of TWAS results ([Giambartolomei et al., 2014](#); [Hormozdiari et al., 2016](#); [Barbeira et al., 2018](#); [Pividori et al., 2020](#); [Gamazon et al., 2015](#); [Wainberg et al., 2019](#)), we further investigated whether the TWAS gene associations had colocalized signals with known eQTLs. Colocalization provides additional evidence that the SNPs in a given expression model are functioning via gene expression regulation to affect the associated trait ([Giambartolomei et al., 2014](#); [Hormozdiari et al., 2016](#); [Barbeira et al., 2018](#); [Pividori et al., 2020](#)).

We applied COLOC ([Giambartolomei et al., 2014](#)) with the PAGE GWAS summary statistics and the AFHI, EUR, and ALL MESA eQTL data ([Mogil et al., 2018](#)). Only the SNPs that were included in the MESA model and the GWAS summary statistics were tested. This allows us to determine if eQTLs are shared between the gene expression prediction models and the GWAS results. In our S-PrediXcan analyses, we identified 152, 91, and 176 genome-wide significant gene-trait pairs using the AFHI, EUR, and ALL models, respectively. Of these gene-trait pairs, 32 AFHI gene-trait pairs, 20 EUR gene-trait pairs, and 37 ALL gene-trait pairs had a colocalization probability  $P_4 > 0.5$ , suggesting the eQTL and GWAS signals are colocalized. Six of the gene-trait pairs were significant in all three (AFHI, EUR, and ALL) analyses. 13 gene-trait pairs were significant in only the AFHI and ALL analyses while another three gene-trait pairs were significant in the EUR and ALL analyses. 228 gene-trait pairs between AFHI, EUR, and ALL (70, 60, and 98 gene-trait pairs, respectively) were found to be independent ( $P_3 > 0.5$ ). However, COLOC could not confirm 50, 11, and 41 gene-trait pairs as either colocalized or independent signals ( $P_3 < 0.5$  and  $P_4 < 0.5$ ) in the AFHI, EUR, and ALL models, respectively. Whether these genes are contributing to their respective traits through gene expression regulation is unknown with current data and colocalization models.

### More AFHI-Discovered Gene-Trait Pairs Replicate in PhenomeXcan Than EUR- or ALL-Discovered Gene-Trait Pairs

To determine if the gene associations we identified in PAGE replicated in TWAS studies of larger European populations, we used PhenomeXcan, a gene-trait association resource ([Pividori et al., 2020](#)). PhenomeXcan is a gene-based resource with the S-MultiXcan cross-tissue gene-trait association results from UK BioBank GWAS Summary Statistics, other accessible large-scale GWAS, and the Genotype-Tissue Expression Project (GTEx) version 8 models ([Pividori et al., 2020](#); [GTEx Consortium, 2020](#)).

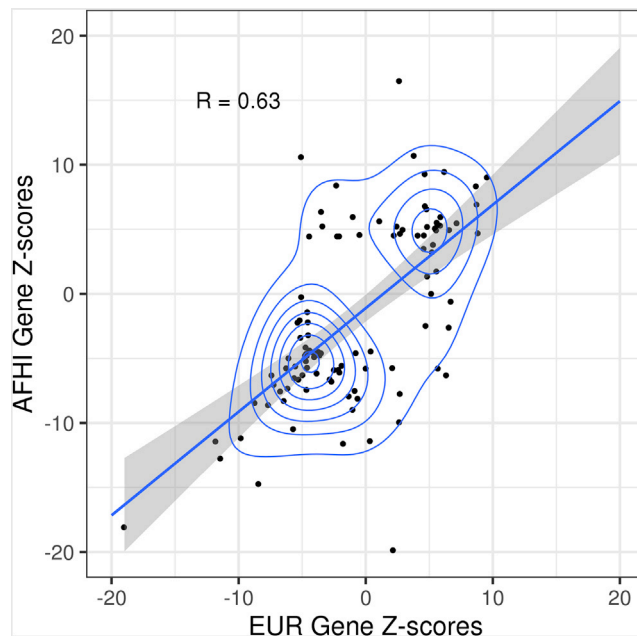

**Figure 1. Z score Comparison of TWAS Significant Genes Identified by AFHI and EUR MESA Transcriptome Prediction Models in PAGE**

Gene-trait pairs that were identified as significant ( $P < 0.05/n$ ,  $n$  = the number of genes in the transcriptome model tested in S-PrediXcan) by either model are displayed. The Pearson correlation of displayed gene-trait pairs is shown in the upper left corner ( $R = 0.63$ ). AFHI = African American and Hispanic/Latino transcriptome prediction model; EUR = European transcriptome prediction model; MESA = Multi-Ethnic Study of Atherosclerosis; PAGE = Population Architecture using Genomics and Epidemiology study.

We tested the 62 unique colocalized gene-trait pairs for replication in the PhenomeXcan database, which includes results from larger European TWAS. We considered PhenomeXcan genes with  $P < 0.0008$  (Bonferroni correction for 62 tests) and the same direction of effect with the same or similar trait as the discovery in PAGE to have replicated. Of the 32 AFHI colocalized discoveries, 11 (0.34) replicated in PhenomeXcan, of the 20 EUR discoveries, 5 (0.25) replicated in PhenomeXcan, and of the 37 ALL colocalized discoveries, 10 (0.27) replicated in PhenomeXcan with the same direction of effect ( $P < 0.0008$  Table S2). Two of the PhenomeXcan replicated gene-trait pairs, *BAK1* with platelet count and *SLC22A4* with height, were significant in the AFHI, EUR, and ALL TWAS.

PhenomeXcan also reports the FASTENLOC calculated regional colocalization probabilities (RCPs) that are greater than 0.1. Given the conservative nature of colocalization approaches, this threshold limits reporting of false negatives (Pividori et al., 2020). When looking at the gene-trait pairs that replicated in PhenomeXcan, all gene-trait pairs had at least one study with an RCP  $> 0.5$ , which provides strong evidence that these genes are colocalized and contributing to the trait through gene expression regulation (Table 2). These genes are *ZBTB38*, *SLC22A4*, *SLC20A2*, *SMIM19*, *SETD9*, *CBL*, and *BAK1*.

One gene that was identified as significantly associated with mean corpuscular hemoglobin concentration (MCHC) in both AFHI and EUR at the stringent threshold of  $1.1 \times 10^{-7}$  was *SMIM19*. In the PAGE GWAS, SNPs near *SMIM19* were found to be associated with MCHC (Wojcik et al., 2019). In our analysis, *SMIM19* was only found to have colocalized GWAS and eQTL signals with AFHI eQTLs ( $P_4 = 0.90$ ), but not with EUR ( $P_4 = 0.047$ ) or ALL ( $P_4 = 0.052$ ) eQTLs (Figure 3, Table S1). *SMIM19* is also significantly associated with MCHC ( $P = 2.81 \times 10^{-23}$ , RCP = 0.578) in PhenomeXcan with GWAS summary statistics from the UKBioBank. A gene located next to *SMIM19* on chromosome 8, *SLC20A2*, associated with MCHC and had colocalized signal with the ALL MESA eQTLs ( $P_4 = 0.68$ ). *SLC20A2* is also significantly associated with MCHC ( $P = 7.28 \times 10^{-21}$ , RCP = 0.507) in PhenomeXcan with GWAS summary statistics from the UK BioBank. While both genes may be involved in MCHC, in our study, *SMIM19* has stronger evidence of acting through gene expression regulation to affect MCHC than *SLC20A2* as indicated by

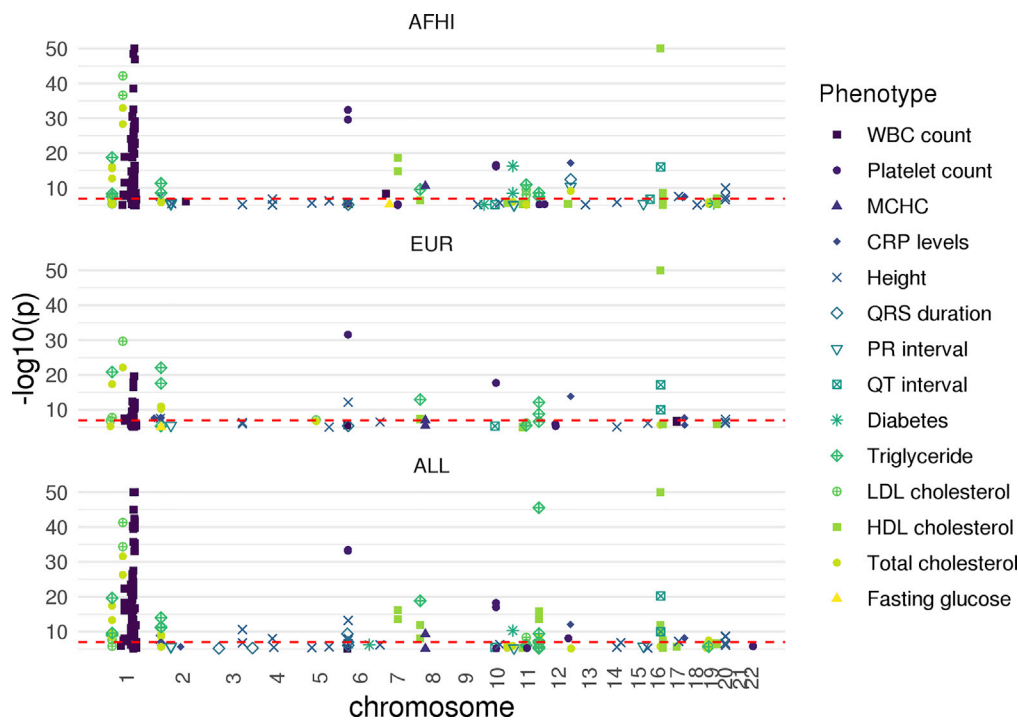

**Figure 2. Manhattan Plot of the 14 of 28 PAGE Phenotypes Tested that Returned Significant TWAS Gene-Trait Pairs Using the AFHI, EUR, and ALL MESA Gene Expression Prediction Models**

Each point represents the  $-\log_{10}(p)$  of a gene association test and gene chromosomal position colored by phenotype. Only significant gene-trait pairs are shown ( $P < 0.05/n$ ,  $n$  = the number of genes in the transcriptome model tested in S-PrediXcan). The dotted line is at the more conservative significance threshold calculated using all tests ( $P < 1.1 \times 10^{-7}$ ). 11 phenotypes have gene associations that meet this more stringent threshold. Using the AFHI, EUR, and ALL models, we identified 95, 46, and 121 significant gene-trait pairs, respectively, at this threshold. Gene-trait pairs with  $P < 1e-50$  are displayed at  $P = 1e-50$  for readability. AFHI = African American and Hispanic/Latino transcriptome prediction model; EUR = European transcriptome model; ALL = African American, Hispanic/Latino, and European transcriptome model; MCHC = mean corpuscular hemoglobin concentration; CRP levels = c-reactive protein levels; WBC count = white blood cell count; MESA = Multi-Ethnic Study of Atherosclerosis; PAGE = Population Architecture using Genomics and Epidemiology study.

higher P4 in PAGE using AFHI, higher cross-validated prediction performance in all populations, and higher RCP in PhenomeXcan (Tables S1 and S2).

Of the 17 unique gene-trait pairs that replicated in PhenomeXcan, 5 of these gene-trait pairs do not appear in the GWAS Catalog and thus may represent new biology discovered through TWAS. These include *ISCA2*, *SETD9*, and *SLC22A4*, associated with height; *VPS45* associated with WBC count; and *GPR84* associated with platelet count. *ISCA2*, *SETD9*, *SLC22A4*, and *VPS45* were significant in AFHI S-PrediXcan while only *SLC22A4* and *GPR84* were significant in EUR S-PrediXcan. *SETD9*, *SLC22A4*, and *VPS45* were significant in ALL S-PrediXcan.

The other 12 gene-trait pairs that replicated in PhenomeXcan were found significant in at least one other GWAS of the same or similar phenotype. In the original PAGE GWAS, *BAK1* in relation to platelet count, *CETP* in relation to HDL cholesterol, *c6orf1* in relation to height, *ZBTB38* in relation to height, and *SMIM19* in relation to MCHC were all mapped as genes nearest to the significantly associated SNP (Table S3).

## DISCUSSION

We applied S-PrediXcan to GWAS results of 28 traits from the PAGE study and found a higher proportion of genes with colocalized GWAS and eQTL signals that replicated in PhenomeXcan using the AFHI transcriptome models than with using EUR or ALL models. This suggests that through using population-matched gene expression prediction models, we find more significant gene-trait pairs that replicate in larger,

| Gene Name      | Z Score | Effect Size | P                     | CHR | P3                   | P4   | Model | Phenotype       | Best PhenomeXcan P     | RCP  |
|----------------|---------|-------------|-----------------------|-----|----------------------|------|-------|-----------------|------------------------|------|
| <i>CETP</i>    | -18     | -12         | $4.2 \times 10^{-73}$ | 16  | $2.3 \times 10^{-3}$ | 1    | AFHI  | HDL cholesterol | $6.1 \times 10^{-97}$  | NA   |
| <i>TMEM258</i> | -4.8    | -17         | $1.7 \times 10^{-6}$  | 11  | $7.1 \times 10^{-3}$ | 0.95 | AFHI  | HDL cholesterol | $1.6 \times 10^{-6}$   | NA   |
| <i>SETD9</i>   | 4.7     | -9.7        | $2.3 \times 10^{-6}$  | 5   | 0.19                 | 0.80 | AFHI  | Height          | $9.6 \times 10^{-17}$  | 0.57 |
| <i>RASA2</i>   | 4.5     | -7.7        | $5.7 \times 10^{-6}$  | 3   | $6.5 \times 10^{-2}$ | 0.92 | AFHI  | Height          | $2.1 \times 10^{-105}$ | NA   |
| <i>UBE2Z</i>   | 5.4     | 9.4         | $2.7 \times 10^{-8}$  | 17  | 0.23                 | 0.77 | AFHI  | Height          | $4.5 \times 10^{-48}$  | NA   |
| <i>ISCA2</i>   | 4.8     | 0.09        | $1.3 \times 10^{-6}$  | 14  | 0.03                 | 0.97 | AFHI  | Height          | $5.8 \times 10^{-25}$  | NA   |
| <i>SLC22A4</i> | -5.0    | -0.05       | $5.3 \times 10^{-7}$  | 5   | 0.17                 | 0.81 | AFHI  | Height          | $6.2 \times 10^{-47}$  | NA   |
| <i>SMIM19</i>  | -6.6    | 0.16        | $3.1 \times 10^{-11}$ | 8   | 0.10                 | 0.90 | AFHI  | MCHC            | $2.8 \times 10^{-23}$  | 0.58 |
| <i>BAK1</i>    | -11     | 0.02        | $2.6 \times 10^{-30}$ | 6   | $4.4 \times 10^{-3}$ | 1    | AFHI  | Platelet count  | $2.6 \times 10^{-149}$ | 0.97 |
| <i>CBL</i>     | -4.5    | -0.06       | $6.0 \times 10^{-6}$  | 11  | $1.8 \times 10^{-2}$ | 0.98 | AFHI  | Platelet count  | $6.9 \times 10^{-60}$  | 0.81 |
| <i>VPS45</i>   | 9.7     | -0.05       | $3.9 \times 10^{-22}$ | 1   | $2.2 \times 10^{-2}$ | 0.95 | AFHI  | WBC count       | $5.8 \times 10^{-6}$   | NA   |
| <i>ZBTB38</i>  | 4.9     | -0.11       | $1.2 \times 10^{-6}$  | 3   | $1.7 \times 10^{-2}$ | 0.98 | EUR   | Height          | $9.5 \times 10^{-150}$ | 0.58 |
| <i>PGP</i>     | -4.9    | -2.6        | $8.0 \times 10^{-7}$  | 16  | $6.7 \times 10^{-3}$ | 0.99 | EUR   | Height          | $1.9 \times 10^{-32}$  | NA   |
| <i>SLC22A4</i> | -4.4    | 0.08        | $9.8 \times 10^{-6}$  | 5   | $4.8 \times 10^{-2}$ | 0.95 | EUR   | Height          | $6.2 \times 10^{-47}$  | NA   |
| <i>BAK1</i>    | -12     | 0.08        | $2.8 \times 10^{-32}$ | 6   | $2.5 \times 10^{-3}$ | 1    | EUR   | Platelet count  | $2.6 \times 10^{-149}$ | 0.97 |
| <i>GPR84</i>   | -5.7    | 0.11        | $1.4 \times 10^{-6}$  | 12  | $3.3 \times 10^{-3}$ | 1    | EUR   | Platelet count  | $3.9 \times 10^{-47}$  | NA   |
| <i>BAK1</i>    | -12     | -13         | $7.0 \times 10^{-34}$ | 6   | $3.9 \times 10^{-3}$ | 1    | ALL   | Platelet count  | $2.6 \times 10^{-149}$ | 0.97 |
| <i>c6orf1</i>  | 7.5     | 0.74        | $6.7 \times 10^{-14}$ | 6   | 0.21                 | 0.54 | ALL   | Height          | $9.0 \times 10^{-132}$ | NA   |
| <i>CETP</i>    | -20     | -7.7        | $4.2 \times 10^{-73}$ | 16  | $2.3 \times 10^{-3}$ | 1    | ALL   | HDL cholesterol | $6.1 \times 10^{-97}$  | NA   |
| <i>NLRC5</i>   | -7.1    | -3.7        | $1.4 \times 10^{-12}$ | 16  | 0.31                 | 0.66 | ALL   | HDL cholesterol | $2.0 \times 10^{-65}$  | NA   |
| <i>PGP</i>     | -4.5    | -0.04       | $5.6 \times 10^{-6}$  | 16  | $1.3 \times 10^{-2}$ | 0.95 | ALL   | Height          | $1.9 \times 10^{-32}$  | NA   |
| <i>SETD9</i>   | 4.6     | 0.02        | $4.3 \times 10^{-6}$  | 5   | 0.19                 | 0.80 | ALL   | Height          | $9.6 \times 10^{-17}$  | 0.57 |
| <i>SLC20A2</i> | -4.5    | -0.25       | $7.9 \times 10^{-6}$  | 8   | 0.32                 | 0.68 | ALL   | MCHC            | $7.3 \times 10^{-21}$  | 0.51 |
| <i>SLC22A4</i> | -4.7    | -0.05       | $2.4 \times 10^{-6}$  | 5   | 0.10                 | 0.89 | ALL   | Height          | $6.2 \times 10^{-47}$  | NA   |
| <i>VPS45</i>   | 8.8     | 0.08        | $1.2 \times 10^{-18}$ | 1   | 0.27                 | 0.69 | ALL   | WBC count       | $5.8 \times 10^{-6}$   | NA   |
| <i>ZBTB38</i>  | 6.7     | 0.18        | $2.6 \times 10^{-11}$ | 3   | $8.3 \times 10^{-3}$ | 0.99 | ALL   | Height          | $9.5 \times 10^{-150}$ | 0.58 |

**Table 2. S-PrediXcan Significant Genes in PAGE with Colocalization Probability (P4) > 0.5 that Replicated in Independent Studies in PhenomeXcan**

Details of the studies used in PhenomeXcan are in [Table S2](#).

P3 = COLOC probability eQTL and GWAS signals are independent; P4 = COLOC probability eQTL and GWAS signals are colocalized; AFHI = African American and Hispanic/Latino transcriptome prediction model; EUR = European transcriptome model; ALL = African American, Hispanic/Latino, and European transcriptome model; MESA = Multi-Ethnic Study of Atherosclerosis; PAGE = Population Architecture using Genomics and Epidemiology study; RCP = PhenomeXcan regional colocalization probability.

independent studies. We found that S-PrediXcan Z-scores are consistent between AFHI and EUR transcriptome models ( $R = 0.63$ ), even if a particular gene was only found significant using one or the other population ([Figure 1](#)). As has been shown in SNP effect size comparisons ([Stranger et al., 2012](#); [Marigorta and Navarro, 2013](#); [Wojcik et al., 2019](#); [Shang et al., 2020](#)), this strong gene effect size correlation indicates the underlying biological pathways affecting each complex trait do not differ between populations. Instead, our power to detect the associations differs and subsequently, predictive power between populations is reduced ([Mogil et al., 2018](#); [Martin et al., 2019](#); [Keys et al., 2020](#)). We have more power to detect associations in PAGE that replicate in independent cohorts using the AFHI transcriptome prediction model because the minor allele frequency and LD structure of AFHI more closely resembles that of PAGE than does the structure of either EUR or ALL ([Mogil et al., 2018](#); [Wojcik et al., 2019](#)).



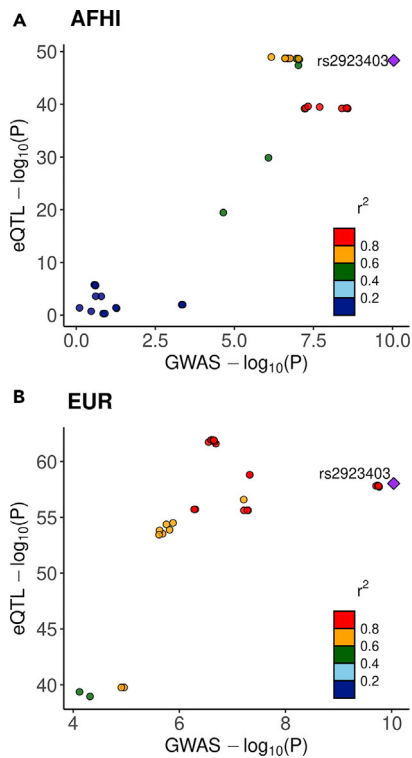

**Figure 3. *SMIM19* GWAS and eQTL Signals are Colocalized in AFHI, but not EUR**

LocusCompare (Liu et al., 2019) plots for mean corpuscular hemoglobin concentration (MCHC) PAGE GWAS p values compared to (A) AFHI MESA eQTL p values and (B) EUR MESA eQTL p values of SNPs in the *SMIM19* prediction models. When most points are located on the diagonal, it indicates the GWAS and eQTL signals are likely colocalized. The lead SNP in the AFHI eQTL and PAGE GWAS, rs2923403, is located among the top signals and in the upper right corner, supporting the COLOC evidence for colocalization AFHI ( $P_4 = 0.90$ ). When using EUR eQTL data in COLOC, the GWAS and eQTL signals did not colocalize (EUR  $P_4 = 0.047$ ). Points are colored according to the pairwise LD  $r^2$  with rs2923403 in (A) AMR and (B) EUR 1000 Genomes populations.

Four gene-trait pairs that replicated in PhenomeXcan mapped as the nearest gene to an associated SNP locus in the original PAGE study (Wojcik et al., 2019). These include *BAK1*, where here we found increased predicted *BAK1* associated with decreased platelet count using all three transcriptome models. We identified *CETP* using the ALL and AFHI models, *SMIM19* using the AFHI transcriptome model, and *ZBTB38* using the EUR and ALL transcriptome models. Increased predicted *CETP* associated with decreased HDL cholesterol levels, supporting previous findings (Barter et al., 2003; Thompson et al., 2003; de Grooth et al., 2004; Kosmas et al., 2016; Andaleon et al., 2019). Increased predicted *SMIM19* expression associated with decreased MCHC. In addition to associating in the original PAGE GWAS, SNPs near *SMIM19* associated with MCHC in two independent GWAS (Hodonsky et al., 2017; Astle et al., 2016). Meanwhile, we found increased predicted *ZBTB38* expression associated with increased height. This association is supported by 17 other independent GWAS (Gudbjartsson et al., 2008; Lettre et al., 2008; Sanna et al., 2008; Weedon et al., 2008; Cho et al., 2009; Soranzo et al., 2009; Kamatani et al., 2010; Kim et al., 2010; Lango Allen et al., 2010; N'Diaye et al., 2011; Bernt et al., 2013; Wood et al., 2014; He et al., 2015; Nagy et al., 2017; Tachmazidou et al., 2017; Kichaev, 2018; Akiyama et al., 2019; Wojcik et al., 2019).

Although not identified in the original PAGE GWAS (Wojcik et al., 2019), SNPs near *PGP* associated with height in European and Japanese GWASs (Tachmazidou et al., 2017; Akiyama et al., 2019). We found increased *PGP* predicted expression associated with decreased height, thus providing more evidence *PGP* affects height through gene expression regulation. Similar to *PGP*, *SLC20A2* was not identified in the original PAGE GWAS but replicated in PhenomeXcan. We found SNPs near *SLC20A2* associated with MCHC in independent GWAS (Kanai et al., 2018), and SNPs near *SLC20A2* were also associated with mean corpuscular hemoglobin volume, a related phenotype to MCHC, in three other independent GWAS (Astle et al., 2016; Kanai et al., 2018; Chen et al., 2020). Here, we found increased *SLC20A2* predicted expression associated with decreased MCHC. More work is needed to disentangle whether *SMIM19* or *SLC20A2*, which are located next to each other on chromosome 8, is causal for MCHC. In our study, *SMIM19* has stronger evidence of acting through gene expression regulation to affect MCHC, but both genes may be involved.

We discovered several gene-trait associations that replicated in PhenomeXcan but were not previously included in the GWAS Catalog and thus may represent new biological mechanisms underlying the traits.

These include *ISCA2*, *SETD9*, *SLC22A4*, *VPS45*, and *GPR84*. Neither *ISCA2* nor *SETD9* were previously identified in GWAS as associated with height; we found increased expression of these genes associated with increased height. *SLC22A4* was not previously identified as associated with height despite our findings demonstrating increased *SLC22A4* expression is associated with decreased height. Similarly, no previous GWAS have linked increased *GPR84* expression to increased platelet count. Mutations in *VPS45* are known to cause neutrophil defect syndrome (Vilboux *et al.*, 2013; Stepensky *et al.*, 2013), and we found significant associations between predicted *VPS45* expression and WBC count.

There are significantly more genes with no evidence of colocalization nor evidence of independence when analyzing the AFHI S-PrediXcan output. These 50 genes could be functioning through gene expression regulation. Better methods, specifically colocalization methods for recently admixed populations, are needed to determine whether these genes are likely functional.

In summary, we found more gene-trait pairs discovered in PAGE with AFHI transcriptome models replicated in PhenomeXcan (11/32, 34%) compared to the gene-trait pairs discovered with EUR models (5/20, 25%) and, to a smaller extent, ALL models (10/37, 27%). Since the largest populations in PAGE are of Hispanic/Latino and African American ancestries, TWAS with population-matched transcriptome models, i.e. AFHI rather than EUR, have more power for discovery and discovered genes are more likely to replicate. Transcriptome prediction models trained in a cohort with similar ancestries to the original GWAS should be used and thus more transcriptome studies in diverse populations are needed.

### Limitations of the Study

Here we identified gene-trait pairs using MESA transcriptome models in conjunction with the PAGE GWAS summary statistics in a TWAS analysis. The MESA models were trained using monocyte transcriptomes, and other tissues are likely more relevant to the phenotypes studied. Better complex trait methods for handling linkage disequilibrium and local ancestry in admixed populations like PAGE and MESA are needed. While the GWAS summary statistics from the combined PAGE populations are currently available in the GWAS Catalog, making within population summary statistics publicly available in future studies will encourage meta-analyses and promote development of more sophisticated models to help narrow the diversity gap in genomics (Peterson *et al.*, 2019; Ben-Eghan *et al.*, 2020). More genomes and transcriptomes in more tissues in admixed populations are needed to enhance model development and to better understand the genetics of complex traits in all populations.

### Resource Availability

#### Lead Contact

Further information and questions should be directed to and will be fulfilled by the Lead Contact, Heather Wheeler ([hwheeler1@luc.edu](mailto:hwheeler1@luc.edu)).

#### Materials Availability

This study did not generate new unique reagents.

#### Data and Code Availability

All scripts used for analyses are available at [https://github.com/WheelerLab/MESA\\_expression\\_prediction](https://github.com/WheelerLab/MESA_expression_prediction). TWAS summary statistics, colocalization results, and MESA models from this study can be found at Mendeley Data: <https://doi.org/10.17632/p8cgvyz4sz>. PAGE GWAS summary statistics are available in the GWAS Catalog at <https://www.ebi.ac.uk/gwas/publications/31217584>.

## METHODS

All methods can be found in the accompanying [Transparent Methods supplemental file](#).

## SUPPLEMENTAL INFORMATION

Supplemental Information can be found online at <https://doi.org/10.1016/j.isci.2020.101850>.

## ACKNOWLEDGMENTS

We would like to thank Kathleen Delany for aiding in the early colocalization pipeline development and Ryan Schubert for providing manuscript feedback. This work is supported by the NIH National Human Genome Research Institute Academic Research Enhancement Award R15 HG009569 (H.E.W.), the Loyola Mulcahy Scholarship (E.G., I.G.), and the Loyola MS Bioinformatics Fellowship (E.G.).

## AUTHOR CONTRIBUTIONS

E.G. and H.E.W. conceived and designed the experiments. E.G. performed S-PrediXcan, colocalization analyses, and GWAS Catalog replication searches. I.G. performed the PhenomeXcan search and performed PubMed searches to identify replication studies. E.G. and H.E.W. wrote the paper. All authors read, provided feedback, and approved the final manuscript.

## DECLARATION OF INTERESTS

The authors declare no competing interests.

Received: September 10, 2020

Revised: November 12, 2020

Accepted: November 18, 2020

Published: December 18, 2020

## REFERENCES

- Akiyama, M., Ishigaki, K., Sakaue, S., Momozawa, Y., Horikoshi, M., Hirata, M., Matsuda, K., Ikegawa, S., Takahashi, A., Kanai, M., et al. (2019). Characterizing rare and low-frequency height-associated variants in the Japanese population. *Nat. Commun.* **10**, 4393.
- Andaleon, A., Mogil, L.S., and Wheeler, H.E. (2019). Genetically regulated gene expression underlies lipid traits in Hispanic cohorts. *PLoS One* **14**, e0220827.
- Astle, W.J., Elding, H., Jiang, T., Allen, D., Ruklisa, D., Mann, A.L., Mead, D., Bouman, H., Riveros-Mckay, F., Kostadima, M.A., et al. (2016). The allelic landscape of human blood cell trait variation and links to common complex disease. *Cell* **167**, 1415–e19.
- Barbeira, A.N., Dickinson, S.P., Bonazzola, R., Zheng, J., Wheeler, H.E., Torres, J.M., Torstenson, E.S., Shah, K.P., Garcia, T., Edwards, T.L., et al. (2018). Exploring the phenotypic consequences of tissue specific gene expression variation inferred from GWAS summary statistics. *Nat. Commun.* **9**, 1825.
- Barbeira, A.N., Pividori, M., Zheng, J., Wheeler, H.E., Nicolae, D.L., and Im, H.K. (2019). Integrating predicted transcriptome from multiple tissues improves association detection. *PLoS Genet.* **15**, e1007889.
- Barter, P.J., Brewer, H.B., Chapman, M.J., Hennekens, C.H., Rader, D.J., and Tall, A.R. (2003). Cholesteryl ester transfer protein: a novel target for raising HDL and inhibiting atherosclerosis. *Arterioscler. Thromb. Vasc. Biol.* **23**, 160–167.
- Ben-Eghan, C., Sun, R., Hleap, J.S., Diaz-Papkovich, A., Munter, H.M., Grant, A.V., Dupras, C., and Gravel, S. (2020). 'Don't ignore genetic data from minority populations'. *Nature* **585**, 184–186.
- Bernt, M., Braband, A., Schierwater, B., and Stadler, P.F. (2013). Genetic aspects of mitochondrial genome evolution. *Mol. Phylogenet. Evol.* **69**, 328–338.
- Bild, D.E., Bluemke, D.A., Burke, G.L., Detrano, R., Diez Roux, A.V., Folsom, A.R., Greenland, P., Jacob, D.R., Kronmal, R., Liu, K., et al. (2002). Multi-ethnic study of atherosclerosis: objectives and design. *Am. J. Epidemiol.* **156**, 871–881.
- Buniello, A., MacArthur, J.A.L., Cerezo, M., Harris, L.W., Hayhurst, J., Malangone, C., McMahon, A., Morales, J., Mountjoy, E., Sollis, E., et al. (2019). The NHGRI-EBI GWAS catalog of published genome-wide association studies, targeted arrays and summary statistics 2019. *Nucleic Acids Res.* **47**, D1005–D1012.
- Chen, M.H., Raffield, L.M., Mousas, A., Sakaue, S., Huffman, J.E., Moscati, A., Trivedi, B., Jiang, T., Akbari, P., Vuckovic, D., et al. (2020). Trans-ethnic and ancestry-specific blood-cell genetics in 746,667 individuals from 5 global populations. *Cell* **182**, 1198–e14.
- Cho, Y.S., Go, M.J., Kim, Y.J., Heo, J.Y., Oh, J.H., Ban, H.J., Yoon, D., Lee, M.H., Kim, D.J., Park, M., et al. (2009). A large-scale genome-wide association study of Asian populations uncovers genetic factors influencing eight quantitative traits. *Nat. Genet.* **41**, 527–534.
- Gamazon, E.R., Wheeler, H.E., Shah, K.P., Mozaffari, S.V., Aquino-Michaels, K., Carroll, R.J., Eyler, A.E., Denny, J.C., Nicolae, D.L., et al. (2015). A gene-based association method for mapping traits using reference transcriptome data. *Nat. Genet.* **47**, 1091–1098.
- Giambartolomei, C., Vukcevic, D., Schadt, E.E., Franke, L., Hingorani, A.D., Wallace, C., and Plagnol, V. (2014). Bayesian test for colocalisation between pairs of genetic association studies using summary statistics. *PLoS Genet.* **10**, e1004383.
- de Groot, G.J., Klerkx, A.H., Stroes, E.S., Stalenhoef, A.F., Kastelein, J.J., and Kuivenhoven, J.A. (2004). A review of CETP and its relation to atherosclerosis. *J. Lipid Res.* **45**, 1967–1974.
- GTEx Consortium (2020). The GTEx Consortium atlas of genetic regulatory effects across human tissues. *Science* **369**, 1318–1330.
- Gudbjartsson, D.F., Walters, G.B., Thorleifsson, G., Stefansson, H., Halldorsson, B.V., Zusmanovich, P., Sulem, P., Thorlacius, S., Gylfason, A., Steinberg, S., et al. (2008). Many sequence variants affecting diversity of adult human height. *Nat. Genet.* **40**, 609–615.
- Gusev, A., Ko, A., Shi, H., Bhatia, G., Chung, W., Penninx, B.W., Jansen, R., de Geus, E.J., Boomsma, D.I., Wright, F.A., et al. (2016). Integrative approaches for large-scale transcriptome-wide association studies. *Nat. Genet.* **48**, 245–252.
- He, M., Xu, M., Zhang, B., Liang, J., Chen, P., Lee, J.Y., Johnson, T.A., Li, H., Yang, X., et al. (2015). Meta-analysis of genome-wide association studies of adult height in East Asians identifies 17 novel loci. *Hum. Mol. Genet.* **24**, 1791–1800.
- Hodonsky, C.J., Jain, D., Schick, U.M., Morrison, J.V., Brown, L., McHugh, C.P., Schurmann, C., Chen, D.D., Liu, Y.M., Auer, P.L., et al. (2017). Genome-wide association study of red blood cell traits in Hispanics/Latinos: the Hispanic Community Health Study/Study of Latinos. *PLoS Genet.* **13**, e1006760.
- Hormozdiari, F., van de Bunt, M., Segrè, A.V., Li, X., Joo, J.W.J., Bilow, M., Sul, J.H., Sankararaman, S., Pasaniuc, B., and Eskin, E. (2016). Colocalization of GWAS and eQTL signals detects target genes. *Am. J. Hum. Genet.* **99**, 1245–1260.
- Kamatani, Y., Matsuda, K., Okada, Y., Kubo, M., Hosono, N., Daigo, Y., Nakamura, Y., and

- Kamatani, N. (2010). Genome-wide association study of hematological and biochemical traits in a Japanese population. *Nat. Genet.* 42, 210–215.
- Kanai, M., Akiyama, M., Takahashi, A., Matoba, N., Momozawa, Y., Ikeda, M., Iwata, N., Ikegawa, S., Hirata, M., Matsuda, K., et al. (2018). Genetic analysis of quantitative traits in the Japanese population links cell types to complex human diseases. *Nat. Genet.* 50, 390–400.
- Keys, K.L., Mak, A.C.Y., White, M.J., Eckalbar, W.L., Dahl, A.W., Mefford, J., Mikhaylova, A.V., Contreras, M.G., Elhawary, J.R., Eng, C., et al. (2020). On the cross-population generalizability of gene expression prediction models. *PLoS Genet.* 16, e1008927.
- Kichaev, G. (2018). Integrative statistical methods to understand the genetic basis of complex trait. UCLA. <https://escholarship.org/uc/item/3w07g23z>.
- Kim, J.J., Lee, H.I., Park, T., Kim, K., Lee, J.E., Cho, N.H., Shin, C., Cho, Y.S., Lee, J.Y., Han, B.G., et al. (2010). Identification of 15 loci influencing height in a Korean population. *J. Hum. Genet.* 55, 27–31.
- Kosmas, C.E., DeJesus, E., Rosario, D., and Vittorio, T.J. (2016). CETP Inhibition: Past Failures and Future Hopes. *Clin Med Insights Cardiol.* 10, 37–42.
- Lango Allen, H., et al. (2010). Hundreds of variants influence human height and cluster within genomic loci and biological pathways. *Nature* 467, 832–838.
- Lettre, G., Jackson, A.U., Gieger, C., Schumacher, F.R., Berndt, S.I., Sanna, S., Eyheramendy, S., Voight, B.F., Butler, J.L., Guiducci, C., et al. (2008). Identification of ten loci associated with height highlights new biological pathways in human growth. *Nat. Genet.* 40, 584–591.
- Levey, A.S., Stevens, L.A., Schmid, C.H., Zhang, Y.L., Castro, A.F., Feldman, H.I., Kusek, J.W., Eggers, P., Van Lente, F., Greene, T., and Coresh, J. (2009). A new equation to estimate glomerular filtration rate. *Ann. Intern. Med.* 150, 604–612.
- Liu, B., Gloudeans, M.J., Rao, A.S., Ingelsson, E., and Montgomery, S.B. (2019). Abundant associations with gene expression complicate GWAS follow-up. *Nat. Genet.* 51, 768–769.
- Liu, Y., Ding, J., Reynolds, L.M., Lohman, K., Register, T.C., De La Fuente, A., Howard, T.D., Hawkins, G.A., Cui, W., Morris, J., et al. (2013). Methyloomics of gene expression in human monocytes. *Hum. Mol. Genet.* 22, 5065–5074.
- Marigorta, U.M., and Navarro, A. (2013). High trans-ethnic replicability of GWAS results implies common causal variants. *PLoS Genet.* 9, e1003566.
- Martin, A.R., Kanai, M., Kamatani, Y., Okada, Y., Neale, B.M., and Daly, M.J. (2019). Clinical use of current polygenic risk scores may exacerbate health disparities. *Nat. Genet.* 51, 584–591.
- Mogil, L.S., Andaleon, A., Badalamenti, A., Dickinson, S.P., Guo, X., Rotter, J.I., Johnson, W.C., Im, H.K., Liu, Y., and Wheeler, H.E. (2018). Genetic architecture of gene expression traits across diverse populations. *PLoS Genet.* 14, e1007586.
- Morales, J., et al. (2018). A standardized framework for representation of ancestry data in genomics studies, with application to the NHGRI-EBI GWAS Catalog. *Genome Biol.* 19, 21.
- Nagy, R., Boutin, T.S., Marten, J., Huffman, J.E., Kerr, S.M., Campbell, A., Evenden, L., Gibson, J., Amador, C., Howard, D.M., et al. (2017). Exploration of haplotype research consortium imputation for genome-wide association studies in 20,032 Generation Scotland participants. *Genome Med.* 9, 23.
- N'Diaye, A., et al. (2011). Identification, replication, and fine-mapping of Loci associated with adult height in individuals of african ancestry. *PLoS Genet.* 7, e1002298.
- Peterson, R.E., Kuchenbaecker, K., Walters, R.K., Chen, C.Y., Popejoy, A.B., Periyasamy, S., Lam, M., Iyegbe, C., Strawbridge, R.J., Brick, L., et al. (2019). Genome-wide association studies in ancestrally diverse populations: opportunities, methods, pitfalls, and recommendations. *Cell* 179, 589–603.
- Pividori, M., et al. (2020). PhenomeXcan: mapping the genome to the phenome through the transcriptome. *Sci. Adv.* <https://doi.org/10.1126/sciadv.aba2083>.
- Sanna, S., Jackson, A.U., Nagaraja, R., Willer, C.J., Chen, W.M., Bonnycastle, L.L., Shen, H., Timpson, N., Lettre, G., Usala, G., et al. (2008). Common variants in the GDF5-UQCC region are associated with variation in human height. *Nat. Genet.* 40, 198–203.
- Shang, L., Smith, J.A., Zhao, W., Kho, M., Turner, S.T., Mosley, T.H., Kardia, S.L.R., and Zhou, X. (2020). Genetic architecture of gene expression in European and African Americans: an eQTL mapping study in GENOA. *Am. J. Hum. Genet.* 106, 496–512.
- Soranzo, N., Rivadeneira, F., Chinappen-Horsley, U., Malkina, I., Richards, J.B., Hammond, N., Stolk, L., Nica, A., Inouye, M., Hofman, A., Stephens, J., et al. (2009). Meta-analysis of genome-wide scans for human adult stature identifies novel Loci and associations with measures of skeletal frame size. *PLoS Genet.* 5, e1000445.
- Stepensky, P., Saada, A., Cowan, M., Tabib, A., Fischer, U., Berkun, Y., Saleh, H., Simanovsky, N., Kogot-Levin, A., Weintraub, M., et al. (2013). The Thr224Asn mutation in the VPS45 gene is associated with the congenital neutropenia and primary myelofibrosis of infancy. *Blood* 121, 5078–5087.
- Stranger, B.E., Montgomery, S.B., Dimas, A.S., Parts, L., Stegle, O., Ingle, C.E., Sekowska, M., Smith, G.D., Evans, D., Gutierrez-Arcelus, M., et al. (2012). Patterns of cis regulatory variation in diverse human populations. *PLoS Genet.* 8, e1002639.
- Tachmazidou, I., Süveges, D., Min, J.L., Ritchie, G.R.S., Steinberg, J., Walter, K., Iotchkova, V., Schwartzentruber, J., Huang, J., Memari, Y., et al. (2017). Whole-genome sequencing coupled to imputation discovers genetic signals for anthropometric traits. *Am. J. Hum. Genet.* 100, 865–884.
- Thompson, J.F., Lira, M.E., Durham, L.K., Clark, R.W., Bamberger, M.J., and Milos, P.M. (2003). Polymorphisms in the CETP gene and association with CETP mass and HDL levels. *Atherosclerosis* 167, 195–204.
- Vilboux, T., Lev, A., Malicdan, M.C., Simon, A.J., Järvinen, P., Racek, T., Puchalka, J., Sood, R., Carrington, B., Bishop, K., et al. (2013). A congenital neutrophil defect syndrome associated with mutations in VPS45. *N. Engl. J. Med.* 369, 54–65.
- Wainberg, M., Sinnott-Armstrong, N., Mancuso, N., Barbeira, A.N., Knowles, D.A., Golan, D., Ermel, R., Ruusalepp, A., Quertermous, T., Hao, K., et al. (2019). Opportunities and challenges for transcriptome-wide association studies. *Nat. Genet.* 51, 592–599.
- Weedon, M.N., Lango, H., Lindgren, C.M., Wallace, C., Evans, D.M., Mangino, M., Freathy, R.M., Perry, J.R., Stevens, S., Hall, A.S., et al. (2008). Genome-wide association analysis identifies 20 loci that influence adult height. *Nat. Genet.* 40, 575–583.
- Wojcik, G.L., Graff, M., Nishimura, K.K., Tao, R., Haessler, J., Gignoux, C.R., Highland, H.M., Patel, Y.M., Sorokin, E.P., Avery, C.L., et al. (2019). Genetic analyses of diverse populations improves discovery for complex traits. *Nature* 570, 514–518.
- Wood, A.R., Esko, T., Yang, J., Vedantam, S., Pers, T.H., Gustafsson, S., Chu, A.Y., Estrada, K., Luan, J., Kutalik, Z., et al. (2014). Defining the role of common variation in the genomic and biological architecture of adult human height. *Nat. Genet.* 46, 1173–1186.

**iScience, Volume 23**

**Supplemental Information**

**Population-Matched Transcriptome**

**Prediction Increases TWAS**

**Discovery and Replication Rate**

**Elyse Geoffroy, Isabelle Gregga, and Heather E. Wheeler**

## Transparent Methods

### Phenotypic and Genotypic Data

The Population Architecture using Genomics and Epidemiology (PAGE) study performed 28 GWAS analyzing different clinical and behavioral phenotypes in diverse populations (Wojcik *et al.*, 2019). We downloaded PAGE GWAS summary statistics from <https://www.ebi.ac.uk/gwas/publications/31217584>. The PAGE cohort includes 22,216 Hispanic/Latino, 17,299 African American, 4,680 Asian, 3,940 Native Hawaiian, 652 Native American, and 1,052 Other self-identified individuals (Wojcik *et al.*, 2019).

### Transcriptome Prediction Models

The Multi-Ethnic Study of Atherosclerosis (MESA) cohort includes individuals recruited from six urban centers throughout the US: Baltimore, MD; Chicago, IL; Forsyth County, NC; Los Angeles County, CA; northern Manhattan, NY; and St. Paul, MN. MESA individuals are self-identified as “Black, African-American,” “White Caucasian,” and “Hispanic” (Bild *et al.*, 2002). The MESA transcriptome dataset comes from the monocytes of over 1,000 individuals (Liu *et al.*, 2013). The genotypic data along with monocyte gene expression data from the MESA study were previously used to create transcriptome prediction models (Mogil *et al.*, 2018). The models consist of protein coding genes with cross-validated  $R^2 > 0.01$  and predictive performance  $P < 0.05$ . We used one transcriptome prediction built with data from individuals with African American and Hispanic ancestries (AFHI,  $n = 578$ ), one model built with data from individuals with white European ancestries (EUR,  $n = 585$ ), and one model built with data from all populations combined, individuals of African American, Hispanic, and European ancestries (ALL,  $n = 1,163$ ). These gene expression prediction models were retrieved from <http://predictdb.org/>.

### Transcriptome-based Association Studies

We used the software Summary-PrediXcan (S-PrediXcan) (Barbeira *et al.*, 2018), an extension of PrediXcan (Gamazon *et al.*, 2015) that infers gene-trait associations using GWAS summary statistics as input, to perform transcriptome-wide association studies (TWAS) of each of the 28 PAGE phenotypes using the MESA gene expression prediction models. GWAS summary statistics are the test statistics and p-values from GWAS rather than the genotype and phenotype data. Instead of using only the AFA and HIS MESA models separately, we used the AFHI combined population model as it best represents the genetic architecture of the majority of individuals included in PAGE and its sample size is similar to the EUR population (Mogil *et al.*, 2018; Wojcik *et al.*, 2019). We also use the ALL MESA model due to its large sample size (Mogil *et al.* 2018).

We considered S-PrediXcan genes significant if they met the threshold of  $P < 0.05/n$ , where  $n$  is the number of genes in the transcriptome model tested in S-PrediXcan. AFHI predicts the expression of 5,557 genes while EUR predicts expression of 4,675 genes and ALL predicts expression of 6,218 genes. We carried gene-trait pairs that met this threshold forward to colocalization analysis. To show some genes meet a more conservative threshold, we also applied a second threshold to correct for the total number of tests performed ( $P < 0.05/(5557*28 + 4675*28 + 6218*28) = P < 1.1e-07$ ). This threshold is overly conservative since many of the traits are correlated.

## Colocalization Analysis

We applied the software COLOC (Giambartolomei *et al.*, 2014; Hormozdiari *et al.*, 2016; Barbeira *et al.*, 2018; Pividori *et al.*, 2020) to MESA eQTL summary statistics (Mogil *et al.*, 2018) and PAGE GWAS summary statistics (Wojcik *et al.*, 2019) to identify if the eQTLs within the gene prediction models and GWAS hits are colocalized. COLOC analyzes a single genomic region at a time with a major focus on interpreting LD patterns at that particular locus, assuming one causal variant (Giambartolomei *et al.*, 2014; Hormozdiari *et al.*, 2016; Barbeira *et al.*, 2018; Pividori *et al.*, 2020). Only SNPs within the predictor models of significant genes from the S-PrediXcan analyses were tested using COLOC. COLOC returns five posterior probabilities (P) for each of the two SNPs tested. A P4 probability ( $P4 > 0.5$ ) indicates that the eQTL and GWAS signals are likely colocalized while a P3 probability  $> 0.5$  suggests independent signals. P0, P1, and P2 values greater than 0.5 suggests an unknown association (Giambartolomei *et al.*, 2014; Hormozdiari *et al.*, 2016; Barbeira *et al.*, 2018; Pividori *et al.*, 2020). To run COLOC with the PAGE GWAS and MESA eQTL data, we used a pipeline developed by the Hae Kyung Im Lab (<https://github.com/hakyimlab/summary-gwas-imputation>).

## LocusCompare Figures

We generated LocusCompare figures using the R package ‘LocusComparer’ (Liu *et al.*, 2019), which takes eQTL and GWAS SNP data, specifically the SNP id and the respective p-values, and plots the signal trends. It determines the lead SNP, labelled with the purple diamond, by identifying the SNP with the lowest sum of p-values from the two studies. The linkage disequilibrium (LD)  $r^2$  values are taken from the 1000 Genomes populations. For our analysis, we applied the admixed American (AMR) 1000 Genomes population LD data with our AFHI MESA results and the EUR 1000 Genomes population LD data with our EUR MESA results.

## Replication in Larger European TWAS

PhenomeXcan, which can be found at <http://apps.hakyimlab.org/phenomexcan/>, is a new gene-based resource that includes S-MultiXcan, a cross-tissue TWAS method, results using the Genotype-Tissue Expression Project (GTEx) version 8 tissue models and GWAS summary statistics from the UK BioBank and other large European ancestries consortia (Pividori *et al.*, 2020; Barbeira *et al.*, 2019).

We searched the PhenomeXcan database for the genes found significant in our S-PrediXcan analyses. From there, we identified if any of the phenotypes for a particular significant gene were related or identical phenotypes to those within the PAGE study (Wojcik *et al.*, 2019). We considered an S-PrediXcan gene-trait pair replicated if the gene-trait pair had  $P < 0.0008$  and the same direction of effect in PhenomeXcan. If there were multiple PhenomeXcan results for the same gene-trait pair with conflicting directions of effect, we did not consider those gene-trait pairs replicated.

**Table S1, Related to Table 2. PAGE S-PrediXcan Results and COLOC Results (xlsx)**

**Table S2, Related to Table 2. PhenomeXcan Replicated Gene-Trait Pairs (xlsx)**

**Table S3, Related to Table 2. PhenomeXcan Replicated Gene-Trait Pairs Supported by Previous GWAS**

| Gene Name     | Phenotype       | Model          | GWAS                                                                                                                                                                                                                                                                                                                                                                                                                                                                                                                                                                                                                                                                                                                                                                                                                                                                                                                                                                                                                                                                                                                                                                                                                                                                                                                                                                                                                                                        |
|---------------|-----------------|----------------|-------------------------------------------------------------------------------------------------------------------------------------------------------------------------------------------------------------------------------------------------------------------------------------------------------------------------------------------------------------------------------------------------------------------------------------------------------------------------------------------------------------------------------------------------------------------------------------------------------------------------------------------------------------------------------------------------------------------------------------------------------------------------------------------------------------------------------------------------------------------------------------------------------------------------------------------------------------------------------------------------------------------------------------------------------------------------------------------------------------------------------------------------------------------------------------------------------------------------------------------------------------------------------------------------------------------------------------------------------------------------------------------------------------------------------------------------------------|
| <i>BAK1</i>   | Platelet count  | AFHI, ALL, EUR | Astle WJ et al 2016, Oh JH et al 2014, Li J et al 2012, Wojcik GL et al 2019, Kanai M et al 2018, Guo MH et al 2016, Chen MH et al 2020                                                                                                                                                                                                                                                                                                                                                                                                                                                                                                                                                                                                                                                                                                                                                                                                                                                                                                                                                                                                                                                                                                                                                                                                                                                                                                                     |
| <i>CBL</i>    | Platelet count  | AFHI           | Gieger C et al 2011, Kanai M et al 2018, and Astle WJ et al 2016, Chen MH et al 2020                                                                                                                                                                                                                                                                                                                                                                                                                                                                                                                                                                                                                                                                                                                                                                                                                                                                                                                                                                                                                                                                                                                                                                                                                                                                                                                                                                        |
| <i>CETP</i>   | HDL cholesterol | AFHI, ALL      | Hiura Y et al 2009, Saxena R et al 2007, Ko A et al 2014, Moore CB et al 2015, Ridker PM et al 2009, Blackburn NB et al 2018, Hebbbar P et al 2018, Smith EN et al 2010, Kurano M et al 2016, Sabatti C et al 2008, Chambers JC et al 2008, Heid IM et al 2008, Weissglas-Volkov D et al 2013, Kraja AT et al 2011, Kathiresan S et al 2008, Wu Y et al 2013, Below JE et al 2016, Keller M et al 2013, Andaleon A et al 2018, Peloso GM et al 2014, Aulchenko YS et al 2008, Kim YJ et al 2011, Willer CJ et al 2008, Coram MA et al 2013, Zhou L et al 2013, Wakil SM et al 2016, Willems EL et al 2019, Gurdasani D et al 2019, Southam L et al 2017, Kathiresan S et al 2008, Waterworth DM et al 2010, Oh SW et al 2020, Bandesh K et al 2019, Deek R et al 2019, Middelberg RP et al 2011, Lettre G et al 2011, Zemunik T et al 2009, Lutz MW et al 2019, Proust C et al 2015, Tabassum R et al 2019, Kamatani Y et al 2010, Lu X et al 2015, Andaleon A et al 2019, Nishida Y et al 2019, Ligthart S et al 2016, Nagy R et al 2017, Teslovich TM et al 2010, Moon S et al 2019, Willer CJ et al 2013, Spracklen CN et al 2017, Surakka I et al 2015, Hoffmann TJ et al 2018, He L et al 2016, Kanai M et al 2018, Klarin D et al 2018, Wojcik GL et al 2019, Noordam R et al 2019, de Vries et al 2019, Bentley AR et al 2019, Postmus I et al 2016, Kilpeläinen TO et al 2019, Richardson TG et al 2020, Tuteja S et al 2018, Ligthart S et al 2016 |
| <i>c6orf1</i> | Height          | ALL            | Cho YS et al 2009, Kim JJ et al 2009, Nagy R et al 2017, Wojcik GL et al 2019, He M et al 2014, Akiyama M et al 2019                                                                                                                                                                                                                                                                                                                                                                                                                                                                                                                                                                                                                                                                                                                                                                                                                                                                                                                                                                                                                                                                                                                                                                                                                                                                                                                                        |
| <i>GPR84</i>  | Platelet count  | EUR            | Novel                                                                                                                                                                                                                                                                                                                                                                                                                                                                                                                                                                                                                                                                                                                                                                                                                                                                                                                                                                                                                                                                                                                                                                                                                                                                                                                                                                                                                                                       |
| <i>ISCA2</i>  | Height          | AFHI           | Novel                                                                                                                                                                                                                                                                                                                                                                                                                                                                                                                                                                                                                                                                                                                                                                                                                                                                                                                                                                                                                                                                                                                                                                                                                                                                                                                                                                                                                                                       |
| <i>NLRC5</i>  | HDL cholesterol | ALL            | Noordam R et al 2019                                                                                                                                                                                                                                                                                                                                                                                                                                                                                                                                                                                                                                                                                                                                                                                                                                                                                                                                                                                                                                                                                                                                                                                                                                                                                                                                                                                                                                        |
| <i>PGP</i>    | Height          | ALL, EUR       | Tachmazidou I et al 2017, Akiyama M et al 2019                                                                                                                                                                                                                                                                                                                                                                                                                                                                                                                                                                                                                                                                                                                                                                                                                                                                                                                                                                                                                                                                                                                                                                                                                                                                                                                                                                                                              |



|                |                 |                      |                                                                                                                                                                                                                                                                                                                                                                                                                                        |
|----------------|-----------------|----------------------|----------------------------------------------------------------------------------------------------------------------------------------------------------------------------------------------------------------------------------------------------------------------------------------------------------------------------------------------------------------------------------------------------------------------------------------|
| <i>RASA2</i>   | Height          | AFHI                 | Tachmazidou I et al 2017, Kichaev G et al 2018                                                                                                                                                                                                                                                                                                                                                                                         |
| <i>SETD9</i>   | Height          | AFHI,<br>ALL         | Novel                                                                                                                                                                                                                                                                                                                                                                                                                                  |
| <i>SLC20A2</i> | MCHC            | ALL                  | Chen MH et al 2020, Kanai M et al 2018, Astle WJ et al 2016                                                                                                                                                                                                                                                                                                                                                                            |
| <i>SLC22A4</i> | Height          | AFHI,<br>ALL,<br>EUR | Novel                                                                                                                                                                                                                                                                                                                                                                                                                                  |
| <i>SMIM19</i>  | MCHC            | AFHI                 | Hodonsky CJ et al 2017, Wojcik GL et al 2019, Astle WJ et al 2016, Chen MH et al 2020                                                                                                                                                                                                                                                                                                                                                  |
| <i>TMEM258</i> | HDL cholesterol | AFHI                 | Klarin et al 2018, Hoffmann TJ et al 2018, Surakka I et al 2015, Spracklen CN I et al 2017,                                                                                                                                                                                                                                                                                                                                            |
| <i>UBE2Z</i>   | Height          | AFHI,<br>ALL         | Akiyama M et al 2019                                                                                                                                                                                                                                                                                                                                                                                                                   |
| <i>VPS45</i>   | WBC count       | AFHI,<br>ALL         | Novel                                                                                                                                                                                                                                                                                                                                                                                                                                  |
| <i>ZBTB38</i>  | Height          | ALL,<br>EUR          | Sanna S et al 2008, Cho YS et al 2009, Kim JJ et al 2009, Wojcik GL et al 2019, Lettre G et al 2008, Weedon MN et al 2008, Okada et al 2010, Soranzo N et al 2009, Gudbjartsson DF et al 2008, Bernt SI et al 2013, Wood AR et al 2014, N'Diaye A et al 2011, Nagy R et al 2017, He M et al 2014, Lango Allen H et al 2010, Tachmazidou I et al 2017, Akiyama M et al 2019, Kichaev G et al 2018, Li D et al 2020, Yang XL et al 2019, |

Gene Name=gene name of PhenomeXcan replicated gene; Phenotype=PAGE phenotype with which the gene is associated; Model=MESA model(s) that identified this significant gene-trait pair in S-PrediXcan; GWAS=Other GWAS studies that replicated this gene-trait pair.

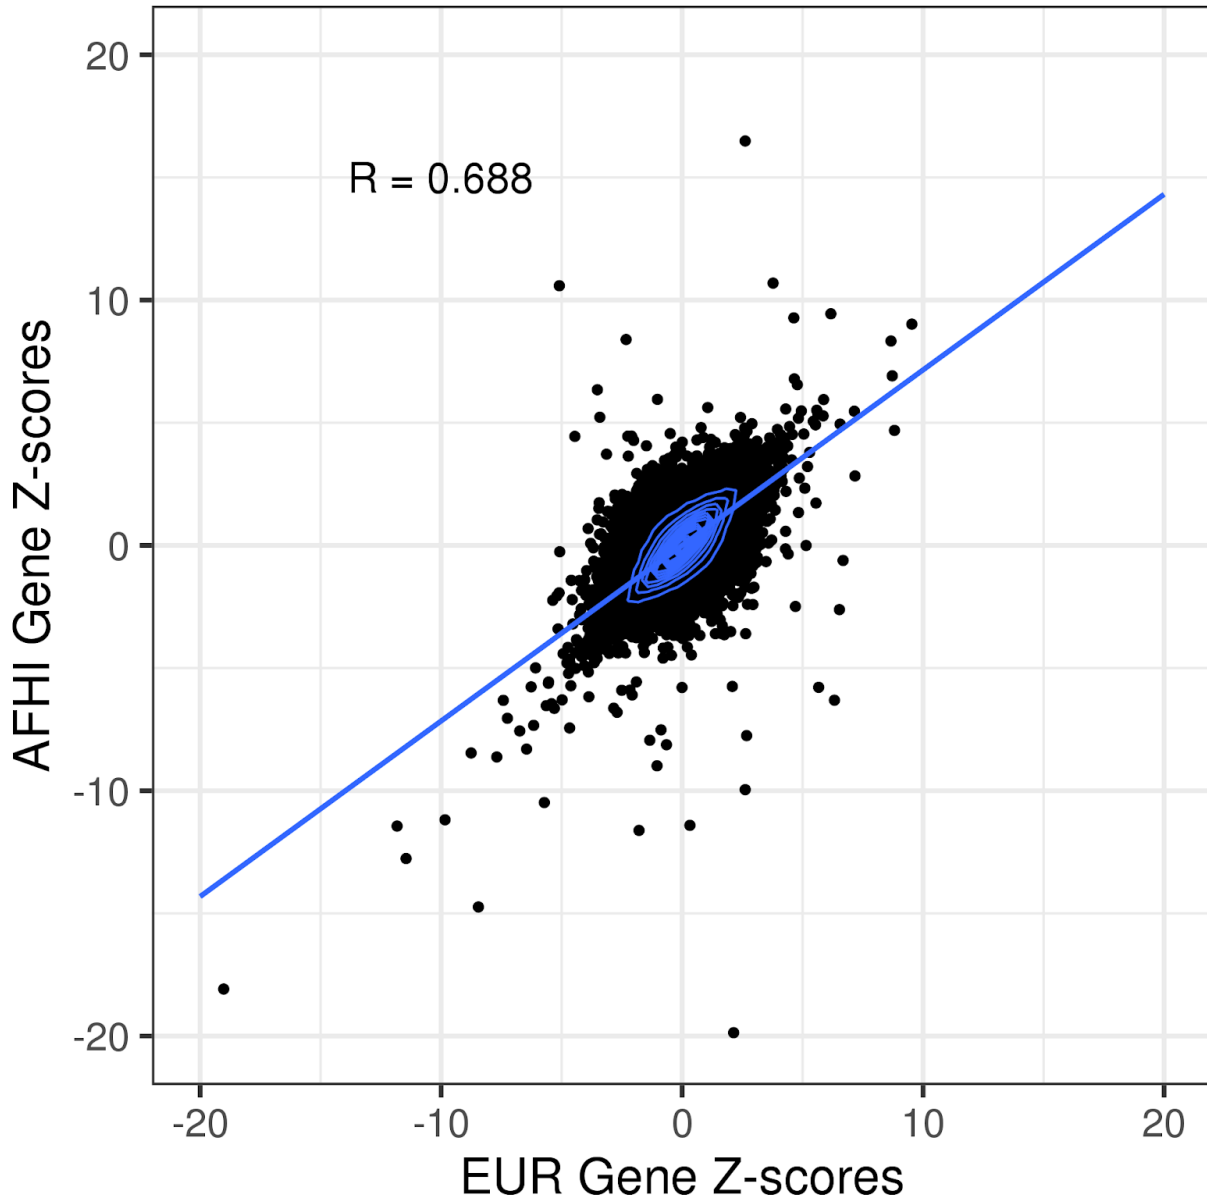

**Figure S1, Related to Figure 1 and Table 2. Z-score comparison of TWAS genes tested by AFHI and EUR MESA transcriptome prediction models.** The Pearson correlation comparing the z-scores of all gene-trait pairs from the AFHI and EUR MESA models is shown in the upper left corner ( $R=0.688$ ). AFHI=African American and Hispanic/Latino transcriptome prediction model; EUR=European transcriptome prediction model; MESA=Multi-Ethnic Study of Atherosclerosis; PAGE=Population Architecture using Genomics and Epidemiology study.

## Supplemental References:

Barbeira, A. N. *et al.* (2018) 'Exploring the phenotypic consequences of tissue specific gene expression variation inferred from GWAS summary statistics', *Nature communications*, 9(1), p. 1825.

Barbeira, A. N. *et al.* (2019) 'Integrating predicted transcriptome from multiple tissues improves association detection', *PLoS genetics*, 15(1), p. e1007889.

Bild, D. E. *et al.* (2002) 'Multi-Ethnic Study of Atherosclerosis: objectives and design', *American journal of epidemiology*, 156(9), pp. 871–881.

Gamazon, E. R. *et al.* (2015) 'A gene-based association method for mapping traits using reference transcriptome data', *Nature genetics*, 47(9), pp. 1091–1098.

Giambartolomei, C. *et al.* (2014) 'Bayesian test for colocalisation between pairs of genetic association studies using summary statistics', *PLoS genetics*, 10(5), p. e1004383.

Hormozdiari, F. *et al.* (2016) 'Colocalization of GWAS and eQTL Signals Detects Target Genes', *American journal of human genetics*, 99(6), pp. 1245–1260.

Liu, B. *et al.* (2019) 'Abundant associations with gene expression complicate GWAS follow-up', *Nature genetics*, 51(5), pp. 768–769.

Liu, Y. *et al.* (2013) 'Methylomics of gene expression in human monocytes', *Human molecular genetics*, 22(24), pp. 5065–5074.

Mogil, L. S. *et al.* (2018) 'Genetic architecture of gene expression traits across diverse populations', *PLoS genetics*, 14(8), p. e1007586.

Pividori, M. *et al.* (2020) 'PhenomeXcan: Mapping the genome to the phenome through the transcriptome', *bioRxiv*. doi: 10.1101/833210.

Wojcik, G. L. *et al.* (2019) 'Genetic analyses of diverse populations improves discovery for complex traits', *Nature*, 570(7762), pp. 514–518.
